# Supplementary material
Source: publisher figshare collection journal article supplement (https://gsajournals.figshare.com/ndownloader/files/15459578)
Supplement: Supplementary file 1 [file 15459578]

**Supplementary Table S5**. Pairwise population *F*STvalues generated by location-based clustering.

| Location regions | KS | TS | TW | TA | TG | MK | MS | NT | LB | BG | TT |
| --- | --- | --- | --- | --- | --- | --- | --- | --- | --- | --- | --- |
| KS | 0 | 0.1857 | 0.0001 | 0.0045 | 0.0002 | 0.0821 | 0.0046 | 0.0257 | 0.0514 | 0.0057 | 0.0068 |
| TS | 0.0264 | 0 | 0.0045 | 0.0232 | 0.0200 | 0.0051 | 0.0002 | 0.0066 | 0.0160 | 0.0072 | 0.0002 |
| TW | 0.1353 | 0.1186 | 0 | 0.1001 | 0.0002 | 0.0002 | 0.0002 | 0.0002 | 0.0002 | 0.0002 | 0.0002 |
| TA | 0.0569 | 0.0545 | 0.0187 | 0 | 0.0002 | 0.0218 | 0.0068 | 0.0213 | 0.0002 | 0.1333 | 0.0002 |
| TG | 0.1405 | 0.1061 | 0.2557 | 0.1625 | 0 | 0.0002 | 0.0002 | 0.0002 | 0.0002 | 0.0002 | 0.0002 |
| MK | 0.0287 | 0.0803 | 0.0661 | 0.0266 | 0.1612 | 0 | 0.1606 | 0.0788 | 0.0025 | 0.0728 | 0.0018 |
| MS | 0.0652 | 0.1052 | 0.1268 | 0.0369 | 0.1895 | 0.0125 | 0 | 0.0259 | 0.0002 | 0.4263 | 0.0002 |
| NT | 0.0329 | 0.0602 | 0.1092 | 0.0210 | 0.1540 | 0.0151 | 0.0220 | 0 | 0.0188 | 0.0840 | 0.0035 |
| LB | 0.0292 | 0.0539 | 0.1044 | 0.0481 | 0.1515 | 0.0446 | 0.0712 | 0.0232 | 0 | 0.0011 | 0.0285 |
| BG | 0.0459 | 0.0614 | 0.0862 | 0.0097 | 0.1397 | 0.0157 | 0.0000 | 0.0104 | 0.0384 | 0 | 0.0001 |
| TT | 0.0502 | 0.1049 | 0.1646 | 0.0816 | 0.1389 | 0.0573 | 0.0935 | 0.0361 | 0.0254 | 0.0758 | 0 |

*FST* Values below diagonal. Probability, *P* (< 0.05) based on 9999 permutations is shown above diagonal. Significant *F*ST values were bolded. Bonferroni adjustment = 0.0009.
